1 **Contrasting patterns and co-occurrence network of soil bacterial and**  
2 **fungal community along depth profiles in cold temperate montane**  
3 **forests of China**

4 **Li Ji<sup>a</sup>, Fangyuan Shen<sup>a</sup>, Yue Liu<sup>a</sup>, Yuchun Yang<sup>b</sup>, Jun Wang<sup>b</sup>, Lixue Yang<sup>a\*</sup>**

5 *<sup>a</sup> Key Laboratory of Sustainable Forest Ecosystem Management-Ministry of*  
6 *Education, School of Forestry, Northeast Forestry University, Harbin 150040, P.R.*  
7 *China*

8 *<sup>b</sup> Jilin Academy of Forestry, Changchun 130033, P.R. China*

9 □ *Corresponding authors*

10 Lixue Yang;

11 E-mail: [ylx\\_0813@163.com](mailto:ylx_0813@163.com)

12

13 **Running Title:** Contrasting altitudinal patterns of soil bacteria and fungi

14 **Article Type:** Original research paper

15 **Number of words:** 6277

16 **Number of text pages:** 24

17 **Number of tables and figures:** 3 tables and 7 figures

18 **Number of references:** 74

19

20 **Abstract:** Soil bacterial and fungal communities with different key ecological  
21 functions play an important role in the boreal forest ecosystem. Despite several  
22 studies have reported the microbial altitudinal distribution patterns, our understanding  
23 about the characteristics of the microbial community and the core composition of the  
24 microbiome in cold-temperate mountain forests is still limited. In this study, Illumina  
25 MiSeq sequencing was used to investigate the changes in soil bacterial and fungal  
26 communities in surface and subsurface soils along at an altitudinal gradient (from 830  
27 m to 1300 m) on Oakley Mountain in the northern Greater Khingan Mountains.  
28 Altitude and soil depth had significant impacts on the relative abundance of  
29 Proteobacteria, Acidobacteria and Actinobacteria (dominant phylum for bacteria), and  
30 altitude had significant impacts on the Ascomycota, Basidiomycota and  
31 Mucoromycota (dominant phylum for fungi). The diversity of bacterial and fungal  
32 communities showed a monotonous decrease and increase with altitude. The influence  
33 of altitude on bacterial and fungal community composition was greater than that of  
34 soil depth. The variation of pH and dissolved organic nitrogen (DON) content in  
35 different altitudes were the main factors driving the bacterial and fungal community  
36 structure, respectively. There is no obvious difference between the network structure  
37 of surface and subsurface soil fungal communities, while the network of subsurface  
38 soil bacterial communities was more complex and compact than the surface layer. The  
39 network nodes mainly belonging to Proteobacteria and Actinobacteria are the key  
40 species in the two soil layers. Our results demonstrated that the altitude had a stronger  
41 influence on soil bacterial and fungal communities than soil depth, and bacterial and

42 fungal communities showed divergent patterns along the altitudes and soil profiles.

43 **Keywords:** soil profile; bacteria; fungi; cold temperate forest; co-occurrence network;

44 Illumina MiSeq sequencing

## 45 **1 Introduction**

46       Soil microorganisms are an important part of the forest ecosystem, and play a  
47 critical role in nutrient conversion, organic matter decomposition and energy flow.  
48 The altitude distribution pattern of soil microorganisms is one of the important  
49 contents of the biogeographic distribution pattern and has been ignored for a long  
50 time. In recent years, with the development of sequencing technology, many scholars  
51 focus on the biogeography of soil microbes, and found that the soil microbial  
52 community is monotonously decreasing (Bryant et al., 2008; Bahram et al., 2012;  
53 Shen et al., 2019), humpback (Miyamoto et al., 2014; Li et al., 2016; Peay et al., 2017)  
54 or on significant patterns along the altitudinal gradients (Fierer et al., 2011; Shen et al.,  
55 2014). However, these studies are mostly concentrated in tropical, subtropical and  
56 temperate regions, and only limited studies have been reported on the altitudinal  
57 distribution of soil microbial communities in cold temperate regions (Jarvis et al.,  
58 2015). The cold temperate forests are considered to be an important habitat for storing  
59 a large amount of biomass carbon (about 30%), have low productivity and nutrient  
60 cycling rate (Reich, 2012), which is very sensitive to climate change, especially in soil  
61 microorganisms and biochemical cycle processes (Christensen et al., 2004; Reich et  
62 al., 2012). The rapid response of microorganisms to changes in environmental  
63 conditions and their high turnover rate may provide more information that indicates  
64 ecosystem service (Banning et al., 2011).

65       Soil bacteria and fungi, as important components of the microflora, exert

66 important ecological functions. Given that their different morphological  
67 characteristics, growth rate, environmental sensitivity, phylogeny and life history, they  
68 exhibit divergent biogeographic patterns (Hannula et al., 2017). Some studies reported  
69 that the growth rate of soil bacteria was approximately ten times higher than that of  
70 specific soil fungi, and soil fungi tend to be more resistant to low-temperature soil  
71 habitats (Rousk and Bååth, 2007; Kirchman, 2018). In a recent study, Ma et al. (2017)  
72 found soil bacteria and fungi had a unique biogeographic distribution in forest soils  
73 across continental-scale, and dispersal limitation and environmental variables  
74 dominated the variation of bacterial and fungal communities. In the mountain  
75 ecosystem, the high variability of plant communities and soil properties along the  
76 altitudinal gradient inevitably leads to dramatic variations for bacteria and fungi.  
77 Jarvis et al. (2015) found that temperature was the main factor affecting the  
78 ectomycorrhizal fungal community in the Mt. Cairngorm in Scotland. The results of  
79 Singh et al. (2014) in Mt. Halla also proved that the annual average temperature and  
80 precipitation played a critical role in the changes in the structure and composition of  
81 bacterial communities along the altitudinal gradient. Moreover, some scholars  
82 believed that temperature had a positive correlation with the species richness of  
83 animals, plants and microorganisms (Hawkins et al., 2003; Zhou et al., 2016). The  
84 metabolic theory based on ecology explained this temperature-diversity relationship.  
85 The biochemical kinetics of metabolism predicted that biodiversity increases with  
86 increasing temperature (Brown et al., 2004). Compared to tropical and subtropical  
87 regions, there is still uncertainty in the cold temperate regions with specific climatic

88 conditions, however, whether soil bacterial and fungal communities have obvious  
89 altitude distribution patterns, and whether temperature or other environmental factors  
90 dominate this variation.

91 In addition to abiotic factors, biotic factors (interactions among species) are also  
92 considered to be the complementary mechanism that affects the biogeographic  
93 patterns of microorganisms (Fan et al., 2017). The symbiosis, parasitism, competition  
94 or predation among different microorganisms in the community will form a complex  
95 co-occurrence network (Faust and Raes, 2012). In recent years, utilizing network  
96 analysis, numerous studies had reported on the interaction and biological complexity  
97 of soil microorganisms in forest ecosystems (Xiao et al., 2018; Li et al., 2020; Tu et  
98 al., 2020). The topological characteristics of the network are used to evaluate  
99 keystone species that regulated ecosystem function and community stability (Cardona  
100 et al., 2016). Some recent studies had indicated the relationship between vertical  
101 distribution and interaction of microbial communities along the soil profiles from the  
102 perspective of network analysis (Yang et al., 2017; Luan et al., 2020). To date, most  
103 studies only focused on the changes in the microbial community and related processes  
104 in surface soil regarding altitudinal gradient (Eilers et al., 2012; Sheng et al., 2019),  
105 however, far too little attention had been paid to subsurface soil, microorganisms in  
106 subsurface soil play a key role in soil formation and biogeochemical cycle processes,  
107 and exhibit greater variation and characteristics different from surface soil (Fritze et  
108 al., 2000). Soil depth can increase the rate of microbial evolution, including gene  
109 mutation, community assembly and interaction, and the microbial community has

110 high stability in the upper soil, while the opposite occurs in the subsurface soil (Du et  
111 al., 2021). Some studies had pronounced the variation in soil physicochemical  
112 properties affected the microbial diversity and community composition along different  
113 soil depths in harsh climate areas (Coolen et al., 2011; Deng et al., 2015). However,  
114 due to the complexity of the soil microbiome, much less is known about the  
115 interactions between microbial members in the community, which limits our  
116 understanding of their role in ecosystem functions (Widder et al., 2016). As far as we  
117 know, the information on the keystones in the soil microbial communities in the  
118 boreal forest ecosystem is still limited. The composition of these microbial  
119 communities along the soil profiles and the framework affecting their community  
120 assembly are yet to be explored.

121 Mountain ecosystems, as an important component of terrestrial ecosystems,  
122 which the regulating services of forests are of particular importance (Seidl et al.,  
123 2019). The habitats have a wide variety of habitats with rapidly changing climate,  
124 vegetation and soil quality can be found in harsh mountain environments (Sundqvist  
125 et al., 2013), these regulating for forests services are of particular importance. Oakley  
126 mountain is the highest peak in the northern in Greater Khingan Mountain, relative to  
127 1520 m above sea level, however, the soil microbial distribution pattern of the boreal  
128 forest ecosystem dominated by larch is rarely reported, which limits our prediction of  
129 the response of soil microbial community to climate change in the cold temperate  
130 region. Given that the high variability of soil microbiomes along an altitudinal  
131 gradient and the fundamental differences in life strategies between bacteria and fungi

132 (Baldrian, 2017), here, we compared the diversity and co-occurrence networks of soil  
133 bacterial and fungal communities along an altitudinal gradient in cold temperate, and  
134 it will generate fresh insight into the main ecological predictors of microbiology along  
135 altitudinal gradients. We hypothesized that (1) with increasing altitude, the diversity,  
136 and structure of soil bacterial and fungal community will show consistent patterns, i.e.  
137 monotonical decline; (2) given previous findings on the factors that dominate changes  
138 in the bacterial and fungal community, temperature and pH may be key factors  
139 affecting changes in the composition and structure of fungi and bacterial community  
140 in cold temperate, respectively; and (3) the soil bacterial and fungal communities  
141 inhabiting surface and subsurface soil will perform different network topology  
142 characteristics.

## 143 **2 Materials and methods**

### 144 *2.1 Study area and sampling*

145 The study area was on Oakley Mountain (51°50'N, 122°01'E) at the Pioneer  
146 Forest Farm of the A'longshan Forestry Bureau in the northern Greater Khingan  
147 Mountains in China. This area is an ideal location for investigating the  
148 biogeographical patterns of soil microbes along an altitudinal gradient due to the steep  
149 topography. This area is characterized by a cold temperate climate with long, cold  
150 winters and short, warm summers. The annual mean air temperature is -5.1°C, and the  
151 annual mean precipitation is 437.4 mm. Oakley Mountain is the highest mountain in  
152 the northern Greater Khingan Mountains and is covered by snow from October to



153 May, i.e., for approximately 7 months each year (Figs. S1). The soils are mostly  
154 Umbri-Gelic Cambosols according to the Chinese taxonomic system, with an average  
155 depth of 20 cm.

156       Based on the variation in the composition of the vegetation community along the  
157 altitudinal gradient (Table S1), soil samples were collected from the southern slope of  
158 Oakley Mountain at four sites representing different elevations (830, 950, 1100, and  
159 1300 m). At each site, we created three 20 × 30 m plots, and eight soil cores of 0~10  
160 cm and 10~20 cm soil depth were randomly collected and thoroughly mixed to make  
161 a composite sample for each plot. The soil samples were collected in July  
162 (mid-growing season) 2019 (N=24) and immediately transported on ice to the  
163 laboratory. We used a button temperature sensor (HOBO H8 Pro, Onset Complete  
164 Corp., Bourne, MA, USA) to record the soil temperature (ST) of each plot. The fresh  
165 soil samples were sieved through a 2 mm sieve, and visible roots and other residues  
166 were removed. Each sample was divided into two subsamples: one that was stored at  
167 -80 °C for DNA extraction, and one that was stored at 4 °C for the measurement of  
168 soil physicochemical properties. Basic information about the sites at the different  
169 elevations is provided in Supplementary Table S1.

## 170 *2.2 Soil physicochemical properties*

171       The soil moisture (SM) and bulk density (BD) were measured by the cutting ring  
172 method. The soil pH was measured using a pH meter (MT-5000, Shanghai) after  
173 shaking a soil water (1:5 w/v) suspension for 30 min. The soil organic carbon (SOC)

174 and total nitrogen (TN) contents in each sample were measured after tableting using a  
175 J200 Tandem laser spectroscopic element analyzer (Applied Spectra, Inc., Fremont,  
176 CA, USA), and the total phosphorus (P) content was determined colorimetrically with  
177 a UV spectrophotometer (TU-1901, Puxi Ltd., Beijing, China) after wet digestion  
178 with HClO<sub>4</sub>-H<sub>2</sub>SO<sub>4</sub>. The soil dissolved organic carbon (DOC) content was analyzed  
179 using a total organic carbon (TOC) analyzer (Analytik Jena, Multi N/C 3000,  
180 Germany), and the soil nitrate (NO<sub>3</sub><sup>-</sup>-N), ammonium (NH<sub>4</sub><sup>+</sup>-N), and total dissolved  
181 nitrogen (DTN) contents were determined using a continuous flow analytical system  
182 (AA3, Seal Co., Germany). The soil dissolved organic nitrogen (DON) was calculated  
183 from the soil contents of NO<sub>3</sub><sup>-</sup>-N, NH<sub>4</sub><sup>+</sup>-N, and DTN. Soil microbial biomass carbon  
184 and nitrogen were determined by the chloroform fumigation method (Brookes et al.,  
185 1985; Joergensen, 1996).

### 186 *2.3 DNA extraction and PCR amplification*

187 Soil bacterial and fungal DNA was extracted from the soil samples using an  
188 E.Z.N.A.® Soil DNA Kit (Omega Biotek, Norcross, GA, U.S.) based on the  
189 manufacturer's protocols. The concentration and purity of the DNA were measured  
190 with a NanoDrop 2000 UV-vis spectrophotometer (Thermo Scientific, Wilmington,  
191 USA). The quality and quantity of the extracted DNA were evaluated with a 1.0%  
192 (w/v) agarose gel. The bacterial 16S and fungal ITS genes were amplified. For  
193 bacteria, the primers 338F (5'-ACTCCTACGGGAGGCAGCAG-3') and 806R  
194 (5'-GGACTACHVGGGTWTCTAAT-3') were used to amplify the V3-V4 region. For

195 fungi, the primers ITS3F (5'-GCATCGATGAAGAACGCAGC-3') and ITS4R  
196 (5'-TCCTCCGCTTATTGATATGC-3') were used to amplify the ITS2 region (Lee et  
197 al., 2012; Gade et al., 2013). All bacterial and fungal primers were performed with a  
198 thermocycler PCR system (GeneAmp 9700, ABI, USA). PCRs were performed in  
199 triplicate in a 20  $\mu$ L mixture composed of 4  $\mu$ L of 5 $\times$  FastPfu Buffer, 2  $\mu$ L of 2.5 mM  
200 dNTPs, 0.8  $\mu$ L of each primer (5  $\mu$ M), 0.4  $\mu$ L of FastPfu Polymerase and 10 ng of  
201 template DNA. The PCRs were conducted using the following program: 3 min of  
202 denaturation at 95  $^{\circ}$ C; 30 cycles of 30 s at 95  $^{\circ}$ C, 30 s for annealing at 55  $^{\circ}$ C, and 45 s  
203 for elongation at 72  $^{\circ}$ C; and a final extension at 72  $^{\circ}$ C for 10 min (Caporaso et al.,  
204 2012).

#### 205 2.4 Illumina MiSeq sequencing and processing of the sequencing data

206 A 2% agarose gel was used to extract the PCR products, which were then  
207 purified with the AxyPrep DNA Gel Extraction Kit (Axygen Biosciences, Union City,  
208 CA, USA). Based on the manufacturer's protocols, the products were quantified using  
209 a QuantiFluor<sup>TM</sup>-ST fluorometer (Promega, USA). Subsequently, the amplicons were  
210 merged on the Illumina MiSeq platform (Illumina, San Diego, USA) in equimolar  
211 amounts and paired-end sequenced (2  $\times$  300 bp) following the standard protocols of  
212 Majorbio Bio-Pharm Technology Co., Ltd. (Shanghai, China). We deposited the raw  
213 reads into the NCBI database (accession number: PRJNA721110 for bacteria,  
214 PRJNA721105 for fungi).

215 Trimmomatic was used to demultiplex the raw fastq files and conduct quality  
216 filtering, and the reads were merged with FLASH with the following procedures

217 implemented (Caporaso et al., 2012): (i) The read segments with an average quality  
218 score <20 in a 50 bp sliding window were truncated. (ii) Primers were precisely  
219 matched, allowing mismatches between two nucleotides, and read segments with  
220 ambiguous bases were deleted. (iii) Sequences with an overlap length of more than 10  
221 bp were combined according to their overlapping portion. UPARSE (version 7.1,  
222 <http://drive5.com/uparse/>) was used to cluster the sequences into operational  
223 taxonomic units (OTUs) based on 97% similarity (Edgar, 2013), and UCHIME was  
224 used to identify chimeric sequences. The taxonomic identities of the gene sequences  
225 for each 16S and ITS were assigned by BLAST against the SILVA bacterial and the  
226 UNITE fungal ITS database, respectively.

## 227 *2.5 Co-occurrence network analysis*

228 Based on random matrix theory (RMT), the molecular ecological network  
229 analysis method (<http://ieg4.rccc.ou.edu/mena/>) was used to construct networks for  
230 the different soil profiles. In most cases, only nodes detected in half or more of the  
231 total sample were retained for subsequent network construction. For more information  
232 about related theories, algorithms and procedures, please refer to Deng et al. (2012)  
233 and Zhou et al. (2011). Spearman rank correlation was used to establish a  
234 co-occurrence network among the soil bacterial and fungal communities, respectively.  
235 When constructing the network, the same similarity threshold ( $S_t$ ) was used to ensure  
236 that the co-occurrence networks in different seasons could be compared with each  
237 other. Then, the same network size and average number of links were used to generate

238 100 corresponding random networks. The  $Z$ -test was used to test for differences  
239 between the empirical network and the random networks. The intra-module  
240 connectivity value ( $Z_i$ ) and inter-module connectivity value ( $P_i$ ) for each node were  
241 used to identify the keystone species in the network (Deng et al., 2016; Olesen et al.,  
242 2007). In this study, we used the following simplified classification and evaluation  
243 criteria: (i) peripheral nodes ( $Z_i \leq 2.5$ ,  $P_i \leq 0.62$ ), which have only a few links that  
244 almost always connect to nodes in their modules; (ii) highly linked connector nodes  
245 ( $Z_i \leq 2.5$ ,  $P_i > 0.62$ ), which have many modules; (iii) module nodes ( $Z_i > 2.5$ ,  $P_i \leq 0.62$ ),  
246 which are highly connected to many nodes in their respective modules; and (iv)  
247 network nodes ( $Z_i > 2.5$ ,  $P_i > 0.62$ ), which act as both module nodes and connection  
248 nodes. To show the results more clearly, Cytoscape (version 3.7.1) was used to  
249 visualize the co-occurrence networks of the soil bacteria and fungi (Cline et al., 2007).

## 250 2.6 Data analysis

251 The alpha diversity indices (observed number of OTUs (Sobs), Chao1, Faith's  
252 phylogenetic diversity (PD), and Simpson) of the Illumina MiSeq sequencing data  
253 were analyzed with QIIME (Caporaso et al., 2012). The Shapiro-Wilk test and Levene  
254 test were used to evaluate the normality of the data and the homogeneity of variance.  
255 Nonmetric multidimensional scaling analysis (NMDS) of beta diversity based on  
256 Bray-Curtis distances was conducted with the 'vegan' package in R (version 3.6.1) to  
257 analyze bacterial and fungal community similarity. Analysis of similarities (ANOSIM)  
258 and permutation multivariate analysis of variance (PERMANOVA) of the Bray-Curtis

259 distances were conducted to test for differences in the properties of the soil bacterial  
260 and fungal communities among different altitudes and depths. To identify the effects  
261 of soil properties on the soil bacterial and fungal communities, redundancy analysis  
262 (RDA) was used to predict the variation in the communities, and a Mantel test with a  
263 Monte Carlo simulation consisting of 999 randomizations was performed. The RDA  
264 function of the ‘vegan’ package and the mantel.rtest function of the ‘ade4’ package in  
265 R were used to perform the RDA and Mantel test, respectively (version 3.6.1) (Team,  
266 2013).

## 267 **3 Results**

### 268 *3.1 Soil physicochemical properties along altitudinal gradients*

269 Altitude had significant effects on soil bulk density (BD), soil moisture (SM),  
270 temperature (ST), pH, inorganic nitrogen, MBC, MBN and DON ( $P < 0.05$ , Table 1).  
271 As the altitude increases, the BD showed a significant decreasing trend, and the SM  
272 showed a significant increasing trend. ST and soil pH at 830m was significantly lower  
273 and higher than other altitudes, respectively. Soil nitrate nitrogen and ammonium  
274 nitrogen are the highest at 1300m and 1100m, respectively. MBC was the highest at  
275 1100 m, which was 242.78% higher than 830m, and MBN was the highest at 950 m,  
276 which was 274.64% higher than 830m. Soil depth had a significant effect on SM and  
277 ST ( $P < 0.05$ ), and the SM and ST of the surface soil were significantly higher than  
278 those of the subsurface soil. The interaction of altitude and soil depth had no  
279 significant effect on all soil factors.

280 **Table 1 The soil physicochemical property for surface and subsurface soils in different**  
 281 **altitudes**

| Soil variables                                         | 830 m          |                 | 950 m          |                 | 1100 m          |                 | 1300 m         |                 | Two-way ANOVA |       |     |
|--------------------------------------------------------|----------------|-----------------|----------------|-----------------|-----------------|-----------------|----------------|-----------------|---------------|-------|-----|
|                                                        | Surface soil   | Subsurface soil | Surface soil   | Subsurface soil | Surface soil    | Subsurface soil | Surface soil   | Subsurface soil | Altitude      | Depth | A×D |
| BD (g·cm <sup>-3</sup> )                               | 0.89±0.13Aa    | 1.18±0.16Aa     | 0.63±0.10ABa   | 0.81±0.08Ba     | 0.58±0.03ABa    | 0.64±0.04Ba     | 0.34±0.02Ba    | 0.45±0.04Ba     | ***           | ns    | ns  |
| SM (%)                                                 | 30.75±3.48Ca   | 20.34±1.31Cb    | 37.48±1.75BCa  | 30.7±3.41BCb    | 47.14±3.85Ba    | 41.71±5.89Bb    | 71.01±3.96Aa   | 58.32±3.55Ab    | ***           | **    | ns  |
| ST (□)                                                 | 9.01±0.87Ba    | 7.00±0.58Bb     | 10.41±0.19ABa  | 9.02±0.29Ab     | 11.61±0.55Aa    | 9.48±0.84Ab     | 10.25±0.35ABa  | 9.23±0.28Ab     | **            | **    | ns  |
| SOC (mg·g <sup>-1</sup> )                              | 61.28±2.65Aa   | 62.08±3.75Aa    | 65.62±3.26Aa   | 62.03±0.23Ba    | 63.14±1.45Aa    | 61.22±1.91Ba    | 61.67±2.54Aa   | 63.83±2.62Aa    | ns            | ns    | ns  |
| TN (mg·g <sup>-1</sup> )                               | 7.02±0.18Aa    | 6.87±0.32Aa     | 6.64±0.30Aa    | 6.97±0.01Aa     | 6.88±0.15Aa     | 7.06±0.12Aa     | 6.97±0.17Aa    | 6.75±0.20Aa     | ns            | ns    | ns  |
| TP (mg·g <sup>-1</sup> )                               | 0.63±0.03Aa    | 0.56±0.03Aa     | 0.47±0.04Aa    | 0.62±0.04Aa     | 0.44±0.04Aa     | 0.34±0.07Aa     | 0.52±0.07Ab    | 1.59±0.17Aa     | ns            | ns    | ns  |
| pH                                                     | 4.68±0.19Aa    | 4.74±0.36Aa     | 3.92±0.10Ba    | 4.21±0.18Aa     | 4.23±0.04Ba     | 4.28±0.06Aa     | 4.01±0.63Ba    | 4.23±0.07Aa     | **            | ns    | ns  |
| NO <sub>3</sub> <sup>-</sup> -N (mg·kg <sup>-1</sup> ) | 5.39±0.08Ba    | 5.35±0.25Ba     | 5.92±0.18Ba    | 5.62±0.04Ba     | 5.57±0.09Ba     | 5.39±0.24Ba     | 6.97±0.32Aa    | 6.43±0.31Aa     | ***           | ns    | ns  |
| NH <sub>4</sub> <sup>+</sup> -N (mg·kg <sup>-1</sup> ) | 63.25±5.23Ba   | 63.34±5.25Ba    | 61.27±2.32Ba   | 58.59±0.53Ba    | 94.68±4.35Aa    | 87.72±2.44Aa    | 88.09±4.84ABa  | 82.02±3.88Aa    | ***           | ns    | ns  |
| DOC (mg·kg <sup>-1</sup> )                             | 163.33±9.58Ba  | 148.13±4.80Ba   | 269.60±17.07Aa | 295.87±9.12Aa   | 291.47±15.44Aa  | 262.80±11.31Aa  | 213.07±9.18Aa  | 233.33±12.41ABa | ns            | ns    | ns  |
| DON (mg·kg <sup>-1</sup> )                             | 15.92±2.31Ba   | 11.48±1.75Ba    | 17.57±1.61Ba   | 15.34±1.22Ba    | 33.33±2.59Aa    | 36.57±2.12Aa    | 32.61±4.74Aa   | 33.73±1.85Aa    | ***           | ns    | ns  |
| MBC (mg·kg <sup>-1</sup> )                             | 456.84±26.86Ba | 307.02±11.88Bb  | 602.81±59.38Ba | 538.95±45.01Ba  | 1565.96±98.72Aa | 1515.79±24.21Aa | 785.26±54.04Ba | 885.26±75.11ABa | *             | ns    | ns  |
| MBN (mg·kg <sup>-1</sup> )                             | 16.05±1.36Ba   | 10.11±1.79Ba    | 60.13±5.40Aa   | 34.69±1.89Ab    | 37.78±1.86Ba    | 36.23±1.15Aa    | 34.29±1.15Ba   | 34.59±1.53Aa    | *             | ns    | ns  |

A: Altitude; 282 Soil depth. Data with different uppercase letters were significantly difference at 5% level among different altitudes in the same soil layer  
 (P<0.05), while 283 different lowercase letters indicate significant differences among different soil layers in the same altitude (P<0.05); ns, not significant; \*,  
 P<0.05; \*\*, 284 P<0.01.

### 285 3.2 Soil bacterial and fungal sequencing summary and community composition

286 The 16S rRNA genes for soil bacteria and ITS genes for fungi were sequenced  
 287 on the Illumina MiSeq platform. Across all soil samples analyzed, 1,472,023  
 288 high-quality soil bacterial and 1,527,911 high-quality soil fungal sequences were  
 289 obtained by Illumina MiSeq sequencing, respectively. A total of 49674~74237 (mean  
 290 = 61334) soil bacterial and 46434~74407 (mean = 63662) soil fungal sequences were  
 291 obtained per sample. The average read length for bacteria and fungi were 411 bp and  
 292 317 bp, which were larger than 99% of Good's coverage for the 16S and ITS gene  
 293 regions, respectively. The rarefaction curves of the genes tended to approach the  
 294 saturation plateau at 97% sequence similarity for all samples (Fig. S2), which  
 295 indicated that the sequencing depth was adequate for evaluating the structure and

296 diversity of soil bacteria and fungi across all samples.

297 For soil bacteria, a total of 6577 OTUs were identified, distributed in 31 phyla,  
298 91 classes and 646 genera. Proteobacteria, Acidobacteria and Actinobacteria were the  
299 dominant phyla, accounting for 75.8% of the total number of bacterial sequences  
300 obtained (Fig. 1A). Altitude and soil depth had a significant effect on the relative  
301 abundance of Chloroflexi, Planctomycetes and Firmicutes (Table S2).  
302 Alphaproteobacteria, Acidobacteriia and Actinobacteria were the dominant classes,  
303 with the relative abundance of 27.0%, 20.0% and 18.2%, respectively (Figure 1B).  
304 The interaction between altitude and soil depth had no significant effect on the  
305 relative abundances of all bacterial phyla and classes (Table S2).

306 For soil fungi, a total of 2739 OTUs were identified, distributed in 14 phyla, 51  
307 classes and 548 genera. At phylum level, fungal communities were dominated by  
308 Ascomycota and Basidiomycota, with the relative abundance of 60.8% and 35.8%,  
309 respectively (Figure 1C). Altitude had a marked effect on the Ascomycota,  
310 Basidiomycota and Mucoromycota, with increasing altitude, the relative abundance of  
311 Ascomycota showed a gradually decreasing trend (Table S3, Figure 1C). The  
312 dominant fungi were Agaricomycetes, Eurotiomycetes and Leotiomycetes at class  
313 level, and their relative abundance accounted for 83.4% of the total number of fungal  
314 sequences (Figure 1D). Soil depth, altitude and their interaction had no significant  
315 difference on the relative abundance of all fungal phyla and classes (Table S3).

316 *3.3 Soil bacterial and fungal community diversity*



317 Altitude had a significant impact on the Sobs, Chao1 and Faith's PD diversity  
318 indices of soil bacterial communities (Figure 2A-2D). In general, the diversity of  
319 bacterial communities decreased with increasing altitude. In the 0-10 cm soil layer,  
320 the Sobs, Chao1 and Faith's PD indices of soil bacteria at 830 m were 23.5%, 25.4%  
321 and 28.9% higher than those at 1300 m, respectively ( $P<0.05$ ). In the 10-20 cm soil  
322 layer, the Sobs, Chao1 and Faith's PD indices of soil bacterial at 830 m were 21.1%,  
323 23.3% and 26.2% higher than those at 1300 m ( $P<0.05$ ). The soil depth had no  
324 significant effect on the alpha diversity of the soil bacterial community.

325 The fungal community alpha diversity index showed a potential increasing trend  
326 with altitude. In the 0-10 cm soil layer, the fungal Sobs, Chao1 and Faith's PD indices  
327 at 1300 m were 42.7%, 40.6% and 50.8% higher than those at 830 m, respectively,  
328 while there was no significant difference in the 10-20 cm soil layer (Figure 2 E, 2G  
329 and 2H). The soil depth had no significant effect on the alpha diversity of the fungal  
330 community (Figure 2E-2H).

331 NMDS analysis based on Bray-Curtis distance was performed on the soil  
332 bacterial and fungal sequencing data corresponding to the different altitudes for two  
333 contrasting soil depths. The bacterial and fungal community were divided into an  
334 obvious group based on altitude, while the group of soil depth in the same altitude for  
335 bacteria and fungi was not evident (Figure 3A and 3B). Compare to soil fungi, the  
336 bacterial community at 950 m, 1100 m and 1300 m were clustered and more similar.  
337 ANOSIM and PERMANOVA revealed significant differences in the structure of both  
338 soil bacterial and fungal community among altitudes ( $P<0.01$ , Figure 3). The

339 PERMANOVA results of all samples demonstrated that altitude had a stronger  
340 influence than soil depth on the structure of the soil bacterial and fungal community  
341 ( $P < 0.01$ , Table S4).

### 342 *3.4 Relationship between the soil microbial community and soil factors*

343 The relationships between the soil factors and microbial community structure  
344 were evaluated by RDA and the Mantel test. The biplots showed that the first two  
345 axes explained more than 75.5% of the variation in both bacterial and fungal  
346 community structure (Figure 4A and 4B). However, there were differences in the main  
347 factors affecting bacterial and fungal community structure. For soil bacteria, pH was  
348 the main influencing factor, followed by BD and SM. Notably, DON exerted a  
349 significant effect on soil fungal community structure (Table 2).

350 **Table 2 Mantel test results for the correlation between relative abundance of bacterial and**  
351 **fungal genera and soil variables in different soil depths along the altitudinal gradient.**

| Soil variables                  | Bacteria |              | Fungi |              |
|---------------------------------|----------|--------------|-------|--------------|
|                                 | $R^2$    | $P$          | $R^2$ | $P$          |
| BD                              | 0.418    | <b>0.007</b> | 0.402 | <b>0.008</b> |
| SM                              | 0.379    | <b>0.008</b> | 0.551 | <b>0.002</b> |
| ST                              | 0.327    | <b>0.013</b> | 0.336 | <b>0.017</b> |
| SOC                             | 0.008    | 0.932        | 0.107 | 0.309        |
| TN                              | 0.005    | 0.959        | 0.132 | 0.224        |
| TP                              | 0.282    | 0.051        | 0.053 | 0.494        |
| pH                              | 0.419    | <b>0.002</b> | 0.232 | 0.077        |
| NO <sub>3</sub> <sup>-</sup> -N | 0.229    | 0.070        | 0.237 | 0.068        |
| NH <sub>4</sub> <sup>+</sup> -N | 0.197    | 0.093        | 0.501 | <b>0.003</b> |
| DOC                             | 0.179    | 0.118        | 0.054 | 0.571        |
| DON                             | 0.179    | <b>0.024</b> | 0.707 | <b>0.001</b> |
| MBC                             | 0.199    | 0.096        | 0.354 | <b>0.017</b> |
| MBN                             | 0.349    | <b>0.012</b> | 0.066 | 0.493        |

### 352 *3.5 Soil bacterial and fungal co-occurrence patterns*

353           The bacterial and fungal co-occurrence networks were constructed with different  
354 soil depths. For soil bacteria, the nodes of OTUs in the network mainly belonged to  
355 Proteobacteria, Actinobacteria, Chloroflexi and Acidobacteria, and the nodes of  
356 bacterial community are divided into 11 and 21 modules in the 0-10 cm and 10-20 cm  
357 soil layers, respectively (Figure 5A, 5B). Compared with the 0-10 cm soil layer, the  
358 number of nodes and connections of the bacterial community in the 10-20 cm soil  
359 layer increased significantly, and its network topological characteristics had a higher  
360 average degree, average clustering coefficient and average path length (Table 3). In  
361 the 0-10 cm and 10-20 cm soil layers, there had 92.9% and 90.8% of the proportions  
362 of positive interaction connections were observed, respectively. For fungi, most of the  
363 nodes belonged to Ascomycota and Basidiomycota, and generated 12 modules for  
364 each soil layer (Figure 6A, 6B). The two soil layers had similar number of nodes,  
365 links, average degree and average clustering coefficient, moreover, the positive and  
366 negative connections of the two soil layers were similar. Compared with the 0-10 cm  
367 soil layer, the 10-20 cm layer soil fungal network had a higher average path length  
368 and degree of modularity (Table 3).

369           Based on  $Z_i$  and  $P_i$  values, we defined the peripheral, network connectors,  
370 module hubs and network hubs in the network.  $Z_i$ - $P_i$  scatter plots for all bacterial and  
371 fungal nodes in two contrasting soil layers were generated based on the module  
372 network. No node belonged to both the module hubs and the network connectors.  
373 There are 98.3% and 97.7% of the nodes as peripheral nodes in the bacterial and  
374 fungal networks, respectively, and they were highly connected in their respective

375 modules (Figure 7A, 7B). For the bacterial network, 11 nodes (mainly belonged to  
 376 Proteobacteria and Acidobacteria) were classified as module hubs, and they had  
 377 strong associations with many nodes in their modules. There had 12 nodes were  
 378 specifically classified as connectors between modules (Figure 7A). There had 10  
 379 nodes (belonging to Ascomycota and Basidiomycota) and 4 nodes (belonging to  
 380 Ascomycota, Basidiomycota, and Mucoromycota) in the fungal network, respectively,  
 381 which are classified as module hubs and network connectors (Figure 7B).

382 **Table 3 The topological properties for soil bacterial and fungal co-occurrence networks in**  
 383 **different soil depths**

| Network features  |                                        | Bacteria     |                 | Fungi        |                 |
|-------------------|----------------------------------------|--------------|-----------------|--------------|-----------------|
|                   |                                        | Surface soil | Subsurface soil | Surface soil | Subsurface soil |
| Empirical network | Similarity threshold (St)              | 0.890        | 0.890           | 0.840        | 0.840           |
|                   | Number of nodes                        | 558          | 764             | 306          | 304             |
|                   | Number of links                        | 595          | 1092            | 424          | 416             |
|                   | $R^2$ of power-law                     | 0.948        | 0.916           | 0.911        | 0.884           |
|                   | Number of positive correlations        | 553 (92.9%)  | 992 (90.8%)     | 359 (84.7%)  | 352 (84.6%)     |
|                   | Number of negative correlations        | 42 (7.1%)    | 100 (9.2%)      | 65 (15.3%)   | 64 (15.4%)      |
|                   | Average degree (avgK)                  | 2.133        | 2.859           | 2.771        | 2.737           |
|                   | Average clustering coefficient (avgCC) | 0.097        | 0.133           | 0.154        | 0.163           |
|                   | Average path distance (GD)             | 6.083        | 6.352           | 6.756        | 7.633           |
|                   | Modularity                             | 0.858        | 0.770           | 0.785        | 0.800           |
| Random network    | avgCC±SD                               | 0.004±0.002  | 0.007±0.002     | 0.011±0.004  | 0.012±0.005     |
|                   | GD±SD                                  | 6.115±0.148  | 4.995±0.060     | 4.991±0.111  | 4.809±0.106     |
|                   | Modularity±SD                          | 0.791±0.006  | 0.648±0.005     | 0.651±0.008  | 0.650±0.008     |

#### 384 4 Discussion

385 Our results highlighted several key findings related to the altitude distribution of  
 386 soil bacterial and fungal communities in cold temperate zones. Firstly, similar to the  
 387 temperate and tropical climate conditions, the bacterial and fungal communities in the

388 cold-temperate mountain ecosystems showed inconsistent patterns, that is,  
389 monotonous declining and monotonic increasing, respectively. Then, compared to the  
390 soil depth, the bacterial and fungal community structure was more sensitive and  
391 fragile to altitude, and the variation of abiotic factors along the altitudinal gradient  
392 dominated the changes in the microbial community. Finally, the co-occurrence  
393 network of bacteria in the subsurface soil had high complexity and modularity, while  
394 the complexity of the fungal network did not change with the increasing soil depth.

395 *4.1 Divergent controlling factors for bacterial and fungal diversity and community*  
396 *composition along an altitudinal gradient*

397 Previous studies of microbial diversity in mountain ecosystems reported different  
398 altitude-diversity patterns (Shen et al., 2013; Shen et al., 2014; Singh et al., 2014;  
399 Peay et al., 2017; Ren et al., 2018; Guo et al., 2020; Shen et al., 2020). Similar to the  
400 results of most studies based on high-throughput sequencing technology (Li et al.,  
401 2018; Shen et al., 2015; Shen et al., 2019), we found that soil bacterial diversity  
402 decreased with increasing altitude, however, the fungal diversity increased with  
403 altitude, which partially supported our first hypothesis. Some recent studies also have  
404 emphasized the inconsistency of bacterial and fungal biogeographical patterns (Peay  
405 et al., 2017; Bahram et al., 2018; Shen et al., 2020). Peay et al. (2017) pointed out that  
406 due to the large differences in the life and evolutionary histories of different taxa, soil  
407 bacteria (single peak) and fungi (linear increase) in the Mt. Hawaiian show different  
408 altitude distribution patterns. In general, the harsh degree of the environment

409 increases with altitude, so that it is expected that the abundance of bacteria and fungi  
410 will decrease along the altitudinal gradient (Margesin et al., 2009). However, we  
411 found that soil fungi maintained a higher diversity at high altitudinal samples, which  
412 may be due to higher soil nutrient levels (DON and ammonium nitrogen), which in  
413 turn promoted the growth of microorganisms (Peay et al., 2017). In addition, we  
414 found that the diversity of bacterial communities was higher than that of fungal  
415 communities, which is consistent with the study of Meng et al. (2013) in subtropical  
416 mountain ecosystems, this result implied the niche differentiation of different  
417 microbial groups along the altitudinal gradient in the cold temperate zone (Prosser et  
418 al., 2007). In this study, the microbial abundance of different taxa showed different  
419 responses to altitude and soil layer. Altitude had a marked effect on some of the higher  
420 abundance bacterial phyla (Actinobacteria, Chloroflexi, Planctomycetes) and fungal  
421 classes (Agaricomycetes, Leotiomycetes, Pezizomycetes, Umbelopsidomycetes).  
422 Shen et al. (2020) recently conducted a more fine-resolution comparison of the  
423 diversity of bacterial and fungal communities in the Mt. Kilimanjaro in East Africa,  
424 and pointed out that the diversity patterns of taxonomic groups (phyla or classes) in  
425 bacterial and fungal communities were different and same, respectively. Due to the  
426 uneven distribution of microbial effective nutrients and plant roots along the soil  
427 profile, the contribution of soil depth may be higher than the geographic difference of  
428 soil microbial communities (Rousk et al., 2010). In this study, whether it was soil  
429 bacteria or fungi, there was no significant difference in their community diversity  
430 between the surface layer and the subsurface layer. The soil depth had a statistically

431 significant impact on the bacterial community richness, but had no significant effect  
432 on fungi. This is probably due to soil fungi have a narrower physiological range than  
433 bacteria. For example, soil fungi are heterotrophic organisms, while soil bacteria can  
434 be photosynthetic autotrophic organisms, heterotrophic organisms or  
435 chemoautotrophic organisms (Lladó et al., 2017). Based on the results of  
436 PERMANOVA, we further verified that in the cold-temperate mountain ecosystem,  
437 the influence of altitude on the community structure of bacteria and fungi is stronger  
438 than that of the soil depth.

439 As we expected, soil pH in cold-temperate mountain ecosystems was a good  
440 predictor of soil bacterial community composition, which is consistent with most  
441 earlier studies (Shen et al., 2013; Bahram et al., 2018; Shen et al., 2019), the pH range  
442 in this study (3.92~4.74) was similar to the study in Changbai Mountain (3.89~6.31)  
443 (Shen et al., 2013), although our pH variability was very small. A previous study  
444 reported the effect of varying soil pH in a small range on bacterial community  
445 structure (Sagova-Mareckova et al., 2015). Rousk et al. (2010) pointed out that the  
446 composition of bacterial communities was mainly affected by soil pH, not due to  
447 diffusion limitations between microbial communities and other environmental factors.  
448 Although many studies had reported the relationship between pH and bacterial  
449 community composition and diversity, in our study, except soil pH, soil moisture also  
450 played an important role in bacterial community. The study of Shen et al. (2020) in Mt.  
451 Kilimanjaro pointed out that the average annual rainfall was the second most  
452 important factor in predicting soil bacterial diversity, which indirectly affected

453 bacterial communities by regulating pH and plant productivity (Tian et al., 2018).  
454 Although many studies had reported the relationship between temperature and soil  
455 fungal communities (Jarvis et al., 2015; Newsham et al., 2016; Shen et al., 2020), our  
456 results weren't line with our expectation that temperature was the main factor  
457 affecting the diversity and composition of the fungal community. In our study, DON  
458 played a critical role in affecting the composition of soil fungal community, followed  
459 by  $\text{NH}_4^+\text{-N}$ . To our knowledge, this was the first reported observation that DON was  
460 an important factor in predicting the variation of soil fungal community composition  
461 and diversity along an altitudinal gradient. Dissolved organic matter (DOM) is an  
462 important part of soil organic matter and provides organic substrates and resources for  
463 heterotrophic microorganisms (Benner, 2011; Huang et al., 2020). Huang et al. (2020)  
464 found in a recent study that DOM quality was the most important driving factor  
465 explaining the diversity and community composition of soil fungi. In this study,  
466 altitude has a significant impact on DON. Vegetation types among different altitudes  
467 have specific effects on the soil physical and chemical properties, especially through  
468 litter pathways that lead to certain differences in the composition of soil organic  
469 matter (Quideau et al., 2001), resulting in different soil microclimates (Knelman et al.,  
470 2012). Shen et al. (2016) reported that DOC can predict the functional genetic  
471 diversity of microorganisms in the Changbai Mountain ecosystem from forest to  
472 tundra. Also, in the study of the small-scale altitudinal gradient of the Changbai  
473 Mountain tundra, Ni et al. (2018) found that the abundance of Ascomycota and  
474 ectomycorrhizal fungi were significantly correlated with the content of DON and



475  $\text{NH}_4^+$ -N, respectively. In general, our research highlighted the different driving factors  
476 for the altitude distribution of bacterial and fungal communities in cold-temperate  
477 forest soils.

478 *4.2 Potentially more connected network of soil bacteria in surface soil than that in*  
479 *subsurface soils*

480 The microbial community is a complex combination of highly interactive taxa  
481 (Fuhrman, 2009). Understanding the correlation of microbes is essential for predicting  
482 the response of microbial communities to climate change, microbial co-occurrence  
483 networks with lower complexity are easily considered stressed by the environment  
484 (Banerjee et al., 2019). It is worth noted that despite the soil depth had a small effect  
485 on the composition and diversity of bacterial and fungal communities, the  
486 co-occurrence network of bacteria and fungi showed different response patterns to the  
487 soil depth, which was consistent with our third hypothesis. For bacterial community,  
488 the differences of the network between different soil layers were more obvious, that is,  
489 the network of subsurface soil had greater modularity, density and more highly  
490 connected nodes than the surface layer. In contrast, there was no obvious difference in  
491 the fungal co-occurrence network between different soil layers. To the best of our  
492 knowledge, this is the first reported study of the co-occurrence network of  
493 microorganisms along the soil profile in the cold temperate zone of China. In a recent  
494 study, de Vries et al. (2018) found that the network of soil fungi was more stable in  
495 response to extreme conditions than bacteria, in addition to vegetation composition,

496 soil moisture played a key role. In this study, the soil moisture and temperature were  
497 highly variable along the soil profile, which may lead to the difference in the response  
498 of this co-occurring network of different microbial groups to the two contrasting soil  
499 layers. A recent study by Tu et al. (2020) on six forests in the United States found that  
500 soil temperature and soil water content were highly correlated with the modularity of  
501 the microbial co-occurrence network. In addition, a possible mechanism behind the  
502 more connected network was the reduction of root input, metabolites and the number  
503 of available substrates in the subsurface soil, which caused more competition or  
504 co-metabolism for substrates of a wide variety of bacterial communities (Upton et al.,  
505 2020). Compared with the fungal network topology, the bacterial network was more  
506 complex, which also implied that the bacterial communities in the cold-temperate  
507 mountain ecosystem were more sensitive to the variation of environmental factors  
508 along the soil profiles. Different from our results, Xiao et al. (2018) compared the  
509 *Phyllostachys edulis* plantation and pointed out that the degree of connectivity of the  
510 bacterial network was lower than that of fungi, which might imply that the different  
511 interaction pattern of microorganisms varied between different habitats. In this study,  
512 OTUs belonging to Proteobacteria and Actinobacteria were mainly used as modular  
513 hubs and network connectors of bacterial networks, playing a critical role in bacterial  
514 co-occurrence networks between different soil layers. Proteobacteria is usually the  
515 dominant nitrogen-fixing bacteria phylum in soil ecosystems (Gaby and Buckley,  
516 2011). Actinobacteria has a mycelial growth pattern in the soil, allowing plants to  
517 expand the surface area in a deeper soil layer to absorb nutrients, and may become the

518 soil aggregate and potentially active components that preserve water and nutrients  
519 (Fierer et al., 2013; Upton et al., 2020). However, the bacterial networks in the surface  
520 and subsurface layers had different keystone compositions, which further confirmed  
521 the niche differentiation of bacterial taxonomic species along the soil profiles. Our  
522 results implied the different patterns of bacterial and fungal networks along the soil  
523 profiles in cold-temperate mountain ecosystems.

## 524 **5 Conclusion**

525 Our research described for the first time the biogeographic distribution of soil  
526 microbial communities in the cold-temperate mountain ecosystem in China. Our  
527 results confirmed that soil bacterial (monotonously decreasing) and fungal  
528 (monotonously increasing) diversity showed inconsistent altitude distribution patterns.  
529 The dramatic variations in soil factors along the altitudinal gradient were the main  
530 causes driving the variation in the community composition and diversity of bacteria  
531 (pH) and fungi (DON). Although the soil microbial community was more affected by  
532 the altitudinal gradient than the soil depth, the network analysis further emphasized  
533 the obvious differences in the bacterial and fungal communities between the two  
534 contrasting soil layers. Compared with soil fungi, soil bacterial communities were  
535 more sensitive to changes in soil quality along the soil profile, and bacterial networks  
536 in subsurface soils exhibit more complex and compact topological features. Further  
537 research could focus on specific taxa, microbial interactions, and the functions of  
538 keystones in a forest ecosystem. This is essential for a better understanding of the

539 mechanisms that affect microbial diversity and functions in this fragile ecosystem.

540

541 **Reference**

- 542 Bahram, M., Hildebrand, F., Forslund, S.K., Anderson, J.L., Soudzilovskaia, N.A.,  
543 Bodegom, P.M., Bengtsson-Palme, J., Anslan, S., Coelho, L.P., Harend, H.,  
544 2018. Structure and function of the global topsoil microbiome. *Nature* 560,  
545 233-237.
- 546 Bahram, M., Polme, S., Koljalg, U., Zarre, S., Tedersoo, L., 2012. Regional and local  
547 patterns of ectomycorrhizal fungal diversity and community structure along an  
548 altitudinal gradient in the Hyrcanian forests of northern Iran. *New Phytol.* 193,  
549 465-473.
- 550 Baldrian, P., 2017. Forest microbiome: diversity, complexity and dynamics. *FEMS*  
551 *Microbiol. Rev.* 41, 109-130.
- 552 Banerjee, S., Walder, F., Buchi, L., Meyer, M., Held, A.Y., Gattinger, A., Keller, T.,  
553 Charles, R., Der Heijden, M.G.A.V., 2019. Agricultural intensification reduces  
554 microbial network complexity and the abundance of keystone taxa in roots.  
555 *ISME J.* 13, 1722-1736.
- 556 Banning, N.C., Gleeson, D.B., Grigg, A.H., Grant, C.D., Andersen, G.L., Brodie, E.L.,  
557 Murphy, D., 2011. Soil microbial community successional patterns during  
558 forest ecosystem restoration. *Appl. Environ. Microbiol.* 77, 6158-6164.
- 559 Benner, R., 2011. Biosequestration of carbon by heterotrophic microorganisms. *Nat.*  
560 *Rev. Microbiol.* 9, 75-75.
- 561 Brookes, P., Landman, A., Pruden, G., Jenkinson, D., 1985. Chloroform fumigation

562 and the release of soil nitrogen: a rapid direct extraction method to measure  
563 microbial biomass nitrogen in soil. *Soil Biol. Biochem.* 17, 837-842.

564 Brown, J.H., Gillooly, J.F., Allen, A.P., Savage, V.M., West, G.B., 2004. Toward a  
565 metabolic theory of ecology. *Ecology* 85, 1771-1789.

566 Bryant, J.A., Lamanna, C., Morlon, H., Kerkhoff, A.J., Enquist, B.J., Green, J.L.,  
567 2008. Colloquium paper: microbes on mountainsides: contrasting elevational  
568 patterns of bacterial and plant diversity. *Proc. Natl. Acad. Sci. Unit. States Am.*  
569 105 Suppl 1, 11505-11511.

570 Caporaso, J.G., Lauber, C.L., Walters, W.A., Berglyons, D., Huntley, J., Fierer, N.,  
571 Owens, S.M., Betley, J.R., Fraser, L., Bauer, M., 2012. Ultra-high-throughput  
572 microbial community analysis on the Illumina HiSeq and MiSeq platforms.  
573 *ISME J.* 6, 1621-1624.

574 Cardona, C., Weisenhorn, P., Henry, C., Gilbert, J.A., 2016. Network-based metabolic  
575 analysis and microbial community modeling. *Curr. Opin. Microbiol.* 31,  
576 124-131.

577 Christensen, T.R., Johansson, T., Åkerman, H.J., Mastepanov, M., Malmer, N.,  
578 Friberg, T., Crill, P., Svensson, B.H., 2004. Thawing subarctic permafrost:  
579 Effects on vegetation and methane emissions. *Geophys. Res. Lett.* 31.

580 Cline, M.S., Smoot, M., Cerami, E., Kuchinsky, A., Landys, N., Workman, C.,  
581 Christmas, R., Avila-Campilo, I., Creech, M., Gross, B., 2007. Integration of  
582 biological networks and gene expression data using Cytoscape. *Nat. Protoc.* 2,  
583 2366.

- 584 Coolen, M.J., van de Giessen, J., Zhu, E.Y., Wuchter, C., 2011. Bioavailability of soil  
585 organic matter and microbial community dynamics upon permafrost thaw.  
586 *Environ. Microbiol.* 13, 2299-2314.
- 587 de Vries, F.T., Griffiths, R.I., Bailey, M., Craig, H., Girlanda, M., Gweon, H.S., Hallin,  
588 S., Kaisermann, A., Keith, A.M., Kretzschmar, M., 2018. Soil bacterial  
589 networks are less stable under drought than fungal networks. *Nat. Commun.* 9,  
590 3033.
- 591 Deng, J., Gu, Y., Zhang, J., Xue, K., Qin, Y., Yuan, M., Yin, H., He, Z., Wu, L., Schuur,  
592 E.A., 2015. Shifts of tundra bacterial and archaeal communities along a  
593 permafrost thaw gradient in Alaska. *Mol. Ecol.* 24, 222-234.
- 594 Du, X., Deng, Y., Li, S., Escalas, A., Feng, K., He, Q., Wang, Z., Wu, Y., Wang, D.,  
595 Peng, X., 2021. Steeper spatial scaling patterns of subsoil microbiota are  
596 shaped by deterministic assembly process. *Mol. Ecol.* 30, 1072-1085.
- 597 Edgar, R.C., 2013. UPARSE: highly accurate OTU sequences from microbial  
598 amplicon reads. *Nat. Method.* 10, 996-998.
- 599 Eilers, K.G., Debenport, S., Anderson, S., Fierer, N., 2012. Digging deeper to find  
600 unique microbial communities: the strong effect of depth on the structure of  
601 bacterial and archaeal communities in soil. *Soil Biol. Biochem.* 50, 58-65.
- 602 Fan, K., Cardona, C., Li, Y., Shi, Y., Xiang, X., Shen, C., Wang, H., Gilbert, J.A., Chu,  
603 H., 2017. Rhizosphere-associated bacterial network structure and spatial  
604 distribution differ significantly from bulk soil in wheat crop fields. *Soil Biol.*  
605 *Biochem.* 113, 275-284.

- 606 Faust, K., Raes, J., 2012. Microbial interactions: from networks to models. *Nat. Rev.*  
607 *Microbiol.* 10, 538-550.
- 608 Fierer, N., Ladau, J., Clemente, J.C., Leff, J.W., Owens, S.M., Pollard, K.S., Knight,  
609 R., Gilbert, J.A., McCulley, R.L., 2013. Reconstructing the microbial diversity  
610 and function of pre-agricultural tallgrass prairie soils in the United States.  
611 *Science* 342, 621-624.
- 612 Fierer, N., McCain, C.M., Meir, P., Zimmermann, M., Rapp, J.M., Silman, M.R.,  
613 Knight, R., 2011. Microbes do not follow the elevational diversity patterns of  
614 plants and animals. *Ecology* 92, 797-804.
- 615 Fritze, H., Pietikäinen, J., Pennanen, T., 2000. Distribution of microbial biomass and  
616 phospholipid fatty acids in Podzol profiles under coniferous forest. *Eur. J. Soil*  
617 *Sci.* 51, 565-573.
- 618 Fuhrman, J.A., 2009. Microbial community structure and its functional implications.  
619 *Nature* 459, 193-199.
- 620 Gaby, J.C., Buckley, D.H., 2011. A global census of nitrogenase diversity. *Environ.*  
621 *Microbiol.* 13, 1790-1799.
- 622 Gade, L., Scheel, C.M., Pham, C.D., Lindsley, M.D., Iqbal, N., Cleveland, A.A.,  
623 Whitney, A.M., Lockhart, S.R., Brandt, M.E., Litvintseva, A.P., 2013.  
624 Detection of fungal DNA in human body fluids and tissues during a multistate  
625 outbreak of fungal meningitis and other infections. *Eukaryot. Cell* 12,  
626 677-683.
- 627 Guo, Y., Ren, C., Yi, J., Doughty, R., Zhao, F., 2020. Contrasting responses of



628 rhizosphere bacteria, fungi and arbuscular mycorrhizal fungi along an  
629 elevational gradient in a temperate montane forest of China. *Front. Microbiol.*  
630 11, 2042.

631 Hannula, S.E., Morrien, E., de Hollander, M., van der Putten, W.H., van Veen, J.A., de  
632 Boer, W., 2017. Shifts in rhizosphere fungal community during secondary  
633 succession following abandonment from agriculture. *ISME J.* 11, 2294-2304.

634 Hawkins, B.A., Field, R., Cornell, H.V., Currie, D.J., Guégan, J.-F., Kaufman, D.M.,  
635 Kerr, J.T., Mittelbach, G.G., Oberdorff, T., O'Brien, E.M., 2003. Energy, water,  
636 and broad-scale geographic patterns of species richness. *Ecology* 84,  
637 3105-3117.

638 Huang, M., Chai, L., Jiang, D., Zhang, M., Jia, W., Huang, Y., 2020. Spatial patterns  
639 of soil fungal communities are driven by dissolved organic matter (DOM)  
640 quality in semi-arid regions. *Microb. Ecol.* 1-13.

641 Jarvis, S.G., Woodward, S., Taylor, A.F., 2015. Strong altitudinal partitioning in the  
642 distributions of ectomycorrhizal fungi along a short (300 m) elevation gradient.  
643 *New Phytol.* 206, 1145-1155.

644 Joergensen, R.G., 1996. The fumigation-extraction method to estimate soil microbial  
645 biomass: calibration of the kEC value. *Soil Biol. Biochem.* 28, 25-31.

646 Kirchman, D.L., 2018. *Processes in microbial ecology.* Oxford University Press.

647 Knelman, J.E., Legg, T.M., O'Neill, S.P., Washenberger, C.L., González, A.,  
648 Cleveland, C.C., Nemergut, D.R., 2012. Bacterial community structure and  
649 function change in association with colonizer plants during early primary

- 650           succession in a glacier forefield. *Soil Biol. Biochem.* 46, 172-180.
- 651   Lee, C.K., Barbier, B.A., Bottos, E.M., McDonald, I.R., Cary, S.C., 2012. The  
652           inter-valley soil comparative survey: the ecology of Dry Valley edaphic  
653           microbial communities. *ISME J.* 6, 1046-1057.
- 654   Li, G., Xu, G., Shen, C., Tang, Y., Zhang, Y., Ma, K., 2016. Contrasting elevational  
655           diversity patterns for soil bacteria between two ecosystems divided by the  
656           treeline. *Sci. China Life Sci.* 59, 1177-1186.
- 657   Li, J., Li, C., Kou, Y., Yao, M., He, Z., Li, X., 2020. Distinct mechanisms shape soil  
658           bacterial and fungal co-occurrence networks in a mountain ecosystem. *FEMS*  
659           *Microbiol. Ecol.* 96.
- 660   Li, J., Shen, Z., Li, C., Kou, Y., Wang, Y., Tu, B., Zhang, S., Li, X., 2018. Stair-step  
661           pattern of soil bacterial diversity mainly driven by ph and vegetation types  
662           along the elevational gradients of gongga mountain, China. *Front. Microbiol.* 9,  
663           569.
- 664   Lladó, S., López-Mondéjar, R., Baldrian, P., 2017. Forest soil bacteria: diversity,  
665           involvement in ecosystem processes, and response to global change. *Microbiol.*  
666           *Mol. Biol. Rev.* 81.
- 667   Luan, L., Liang, C., Chen, L., Wang, H., Xu, Q., Jiang, Y., Sun, B., 2020. Coupling  
668           Bacterial Community Assembly to Microbial Metabolism across Soil Profiles.  
669           *mSystems* 5.
- 670   Ma, B., Dai, Z., Wang, H., Dsouza, M., Liu, X., He, Y., Wu, J., Rodrigues, J.L.,  
671           Gilbert, J.A., Brookes, P.C., 2017. Distinct biogeographic patterns for archaea,

672 bacteria, and fungi along the vegetation gradient at the continental scale in  
673 Eastern China. *Msystems* 2.

674 Margesin, R., Jud, M., Tscherko, D., Schinner, F., 2009. Microbial communities and  
675 activities in alpine and subalpine soils. *FEMS Microbiol. Ecol.* 67, 208-218.

676 Meng, H., Li, K., Nie, M., Wan, J.-R., Quan, Z.-X., Fang, C.-M., Chen, J.-K., Gu,  
677 J.-D., Li, B., 2013. Responses of bacterial and fungal communities to an  
678 elevation gradient in a subtropical montane forest of China. *Appl. Microbiol.*  
679 *Biotechnol.* 97, 2219-2230.

680 Miyamoto, Y., Nakano, T., Hattori, M., Nara, K., 2014. The mid-domain effect in  
681 ectomycorrhizal fungi: range overlap along an elevation gradient on Mount  
682 Fuji, Japan. *ISME J.* 8, 1739-1746.

683 Newsham, K.K., Hopkins, D.W., Carvalhais, L.C., Fretwell, P.T., Rushton, S.P.,  
684 O'Donnell, A.G., Dennis, P.G., 2016. Relationship between soil fungal  
685 diversity and temperature in the maritime Antarctic. *Nat. Clim. Change* 6,  
686 182-186.

687 Ni, Y., Yang, T., Zhang, K., Shen, C., Chu, H., 2018. Fungal communities along a  
688 small-scale elevational gradient in an alpine tundra are determined by soil  
689 carbon nitrogen ratios. *Front. Microbiol.* 9, 1815.

690 Peay, K.G., von Sperber, C., Cardarelli, E., Toju, H., Francis, C.A., Chadwick, O.A.,  
691 Vitousek, P.M., 2017. Convergence and contrast in the community structure of  
692 bacteria, fungi and archaea along a tropical elevation–climate gradient. *FEMS*  
693 *Microbiol. Ecol.* 93.

- 694 Prosser, J.I., Bohannan, B.J., Curtis, T.P., Ellis, R.J., Firestone, M.K., Freckleton, R.P.,  
695 Green, J.L., Green, L.E., Killham, K., Lennon, J.J., 2007. The role of  
696 ecological theory in microbial ecology. *Nat. Rev. Microbiol.* 5, 384-392.
- 697 Quideau, S., Chadwick, O., Benesi, A., Graham, R., Anderson, M., 2001. A direct link  
698 between forest vegetation type and soil organic matter composition. *Geoderma*  
699 104, 41-60.
- 700 Reich, P.B., 2012. Key canopy traits drive forest productivity. *Proc. Royal Soc. B:*  
701 *Biol.Sci.* 279, 2128-2134.
- 702 Reich, P.B., Frelich, L.E., Voldseth, R.A., Bakken, P., Adair, E.C., 2012. Understorey  
703 diversity in southern boreal forests is regulated by productivity and its indirect  
704 impacts on resource availability and heterogeneity. *J. Ecol.* 100, 539-545.
- 705 Ren, C., Zhang, W., Zhong, Z., Han, X., Yang, G., Feng, Y., Ren, G., 2018.  
706 Differential responses of soil microbial biomass, diversity, and compositions  
707 to altitudinal gradients depend on plant and soil characteristics. *Sci. Total*  
708 *Environ.* 610-611, 750.
- 709 Rousk, J., Bååth, E., 2007. Fungal biomass production and turnover in soil estimated  
710 using the acetate-in-ergosterol technique. *Soil Biol. Biochem.* 39, 2173-2177.
- 711 Rousk, J., Bååth, E., Brookes, P.C., Lauber, C.L., Lozupone, C., Caporaso, J.G.,  
712 Knight, R., Fierer, N., 2010. Soil bacterial and fungal communities across a  
713 pH gradient in an arable soil. *ISME J.* 4, 1340-1351.
- 714 Sagova-Mareckova, M., Cermak, L., Omelka, M., Kyselkova, M., Kopecky, J., 2015.  
715 Bacterial diversity and abundance of a creek valley sites reflected soil pH and

- 716 season. *Open Life Sci.* 1.
- 717 Seidl, R., Albrich, K., Erb, K., Formayer, H., Leidinger, D., Leitinger, G., Tappeiner,  
718 U., Tasser, E., Rammer, W., 2019. What drives the future supply of regulating  
719 ecosystem services in a mountain forest landscape? *Forest Ecol. Manag.* 445,  
720 37-47.
- 721 Shen, C., Gunina, A., Luo, Y., Wang, J., He, J.Z., Kuzyakov, Y., Hemp, A., Classen,  
722 A.T., Ge, Y., 2020. Contrasting patterns and drivers of soil bacterial and fungal  
723 diversity across a mountain gradient. *Environ. Microbiol.*
- 724 Shen, C., Liang, W., Shi, Y., Lin, X., Zhang, H., Wu, X., Xie, G., Chain, P., Grogan, P.,  
725 Chu, H., 2014. Contrasting elevational diversity patterns between eukaryotic  
726 soil microbes and plants. *Ecology* 95, 3190-3202.
- 727 Shen, C., Ni, Y., Liang, W., Wang, J., Chu, H., 2015. Distinct soil bacterial  
728 communities along a small-scale elevational gradient in alpine tundra. *Front.*  
729 *Microbiol.* 6, 582.
- 730 Shen, C., Shi, Y., Fan, K., He, J., Adams, J.M., Ge, Y., Chu, H., 2019. Soil pH  
731 dominates elevational diversity pattern for bacteria in high elevation alkaline  
732 soils on the Tibetan Plateau. *FEMS Microbiol. Ecol.* 95.
- 733 Shen, C., Shi, Y., Ni, Y., Deng, Y., Van Nostrand, J.D., He, Z., Zhou, J., Chu, H., 2016.  
734 Dramatic increases of soil microbial functional gene diversity at the treeline  
735 ecotone of Changbai mountain. *Front. Microbiol.* 7, 1184.
- 736 Shen, C., Xiong, J., Zhang, H., Feng, Y., Lin, X., Li, X., Liang, W., Chu, H., 2013.  
737 Soil pH drives the spatial distribution of bacterial communities along elevation

- 738           on Changbai Mountain. *Soil Biol. Biochem.* 57, 204-211.
- 739   Sheng, Y., Cong, J., Lu, H., Yang, L., Liu, Q., Li, D., Zhang, Y., 2019. Broad-leaved  
740           forest types affect soil fungal community structure and soil organic carbon  
741           contents. *MicrobiologyOpen* 8, e874.
- 742   Singh, D., Lee-Cruz, L., Kim, W.-S., Kerfahi, D., Chun, J.-H., Adams, J.M., 2014.  
743           Strong elevational trends in soil bacterial community composition on Mt.  
744           Halla, South Korea. *Soil Biol. Biochem.* 68, 140-149.
- 745   Sundqvist, M.K., Sanders, N.J., Wardle, D.A., 2013. Community and ecosystem  
746           responses to elevational gradients: processes, mechanisms, and insights for  
747           global change. *Annu. Rev. Ecol. Evol. Syst.* 44, 261-280.
- 748   Team, R.C., 2013. R: A language and environment for statistical computing.
- 749   Tian, J., He, N., Hale, L., Niu, S., Yu, G., Liu, Y., Blagodatskaya, E., Kuzyakov, Y.,  
750           Gao, Q., Zhou, J., 2018. Soil organic matter availability and climate drive  
751           latitudinal patterns in bacterial diversity from tropical to cold temperate forests.  
752           *Funct. Ecol.* 32, 61-70.
- 753   Tu, Q., Yan, Q., Deng, Y., Michaletz, S.T., Buzzard, V., Weiser, M.D., Waide, R., Ning,  
754           D., Wu, L., He, Z., 2020. Biogeographic patterns of microbial co-occurrence  
755           ecological networks in six American forests. *Soil Biol. Biochem.* 107897.
- 756   Upton, R.N., Checinska Sielaff, A., Hofmockel, K.S., Xu, X., Polley, H.W., Wilsey,  
757           B.J., 2020. Soil depth and grassland origin cooperatively shape microbial  
758           community co-occurrence and function. *Ecosphere* 11, e02973.
- 759   Widder, S., Allen, R.J., Pfeiffer, T., Curtis, T.P., Wiuf, C., Sloan, W.T., Cordero, O.X.,

760 Brown, S.P., Momeni, B., Shou, W., 2016. Challenges in microbial ecology:  
761 building predictive understanding of community function and dynamics.  
762 *ISME J.* 10, 2557-2568.

763 Xiao, X., Liang, Y., Zhou, S., Zhuang, S., Sun, B., 2018. Fungal community reveals  
764 less dispersal limitation and potentially more connected network than that of  
765 bacteria in bamboo forest soils. *Mol. Ecol.* 27, 550-563.

766 Yang, T., Adams, J.M., Shi, Y., Sun, H., Cheng, L., Zhang, Y., Chu, H., 2017. Fungal  
767 community assemblages in a high elevation desert environment: Absence of  
768 dispersal limitation and edaphic effects in surface soil. *Soil Biol. Biochem.*  
769 115, 393-402.

770 Zhou, J., Deng, Y., Shen, L., Wen, C., Yan, Q., Ning, D., Qin, Y., Xue, K., Wu, L., He,  
771 Z., 2016. Temperature mediates continental-scale diversity of microbes in  
772 forest soils. *Nat. Commun.* 7, 1-10.

773

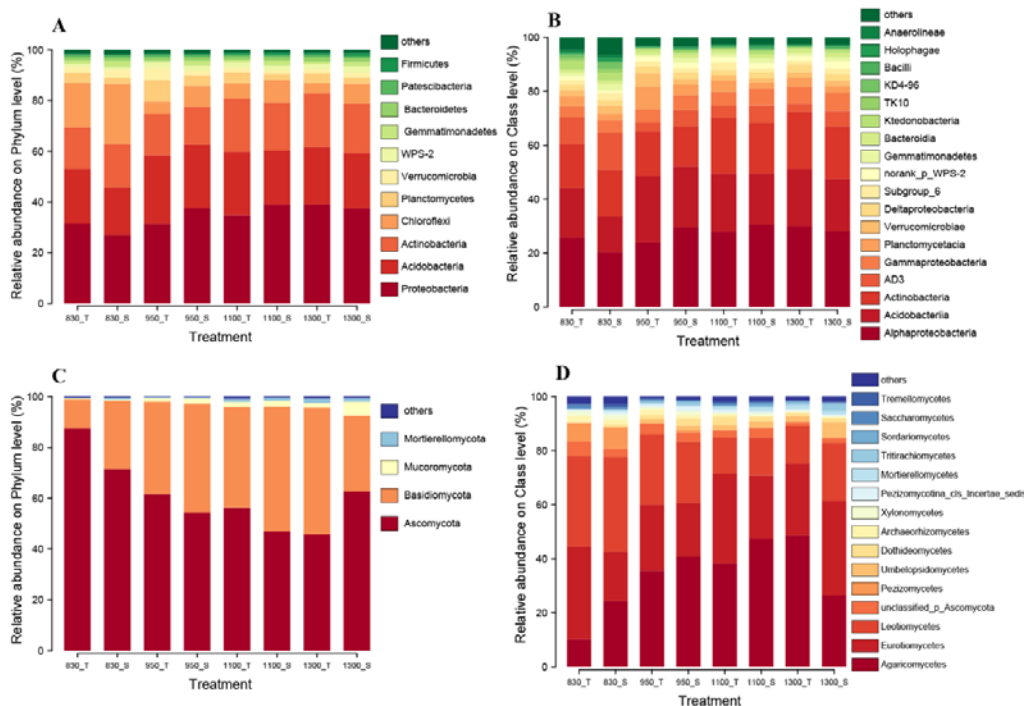

774

775 **Figure 1** Relative abundances of main soil bacterial and fungal phyla (A, C) and classes (B, 776 D) for surface and subsurface soils in different altitudes. 830\_T, 950\_T, 1100\_T and 1300\_T 777 indicate the surface soil in 830 m, 950 m, 1100 m and 1300 m, respectively. 830\_S, 950\_S, 778 1100\_S and 1300\_S indicate the subsurface soil in 830 m, 950 m, 1100 m and 1300 m, 779 respectively.

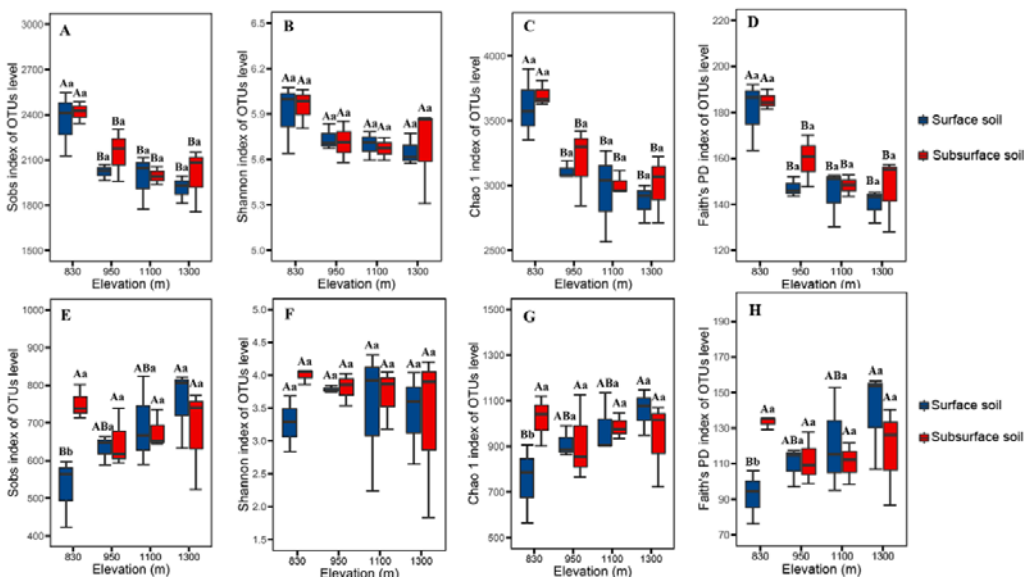

780

781 **Figure 2** Sobs, Shannon, Chao1 and Faith's PD indices of soil bacterial and fungal 782 communities for surface and subsurface soils in different altitudes. OTUs were delineated at 783 97% sequence similarity. These indices were calculated using bacterial and fungal random 784 subsamples of 49674 and 46343 gene sequences per sample. Two-way ANOVA for altitude and 785 soil depth was conducted.



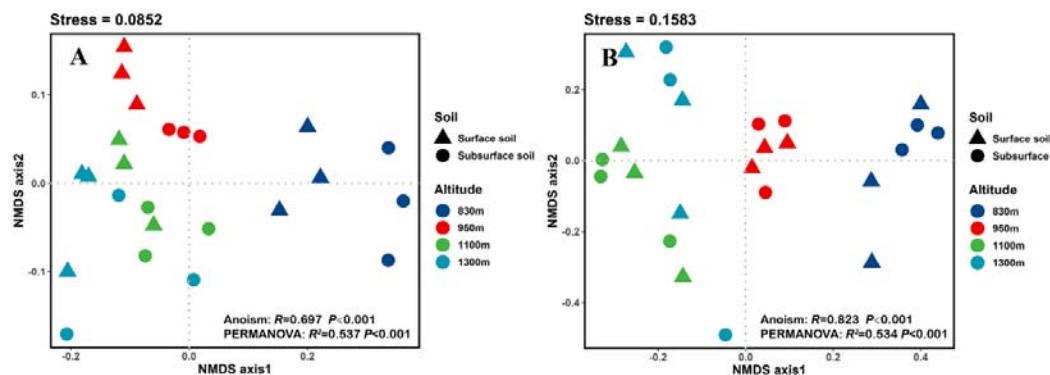

786

787 **Figure 3** Principal coordinate analysis of soil bacterial (A) and fungal (B) communities based  
788 on Bray-Curtis distances.

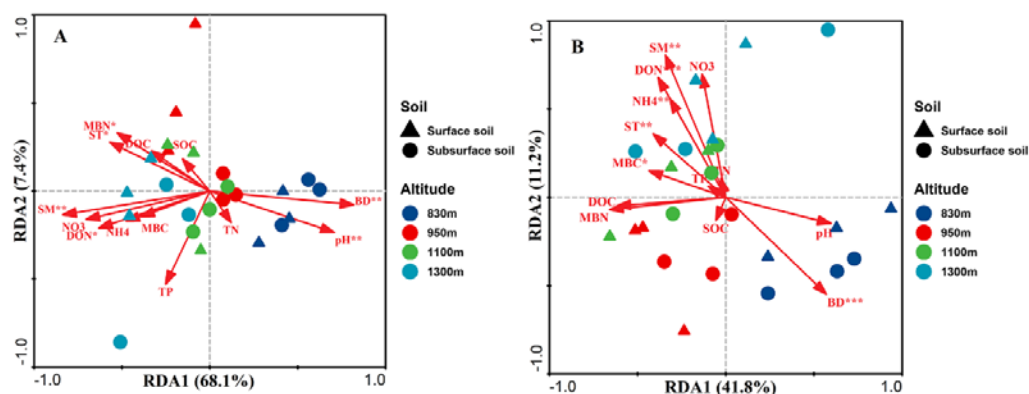

789

790 **Figure 4** Redundancy analysis based on soil bacterial (A) and fungal (B) community at the  
791 genus level and soil factors (red arrows). The top 20 most abundant classified bacterial and  
792 fungal genera (97% sequence similarity) in the soil samples. Direction of arrow indicates the soil  
793 factors associated with changes in the community structure, and the length of the arrow indicates  
794 the magnitude of the association. The asterisk represents the significant soil factors associated  
795 with the bacterial or fungal community. The percentage of variation explained by RDA 1 and 2 is  
796 shown.

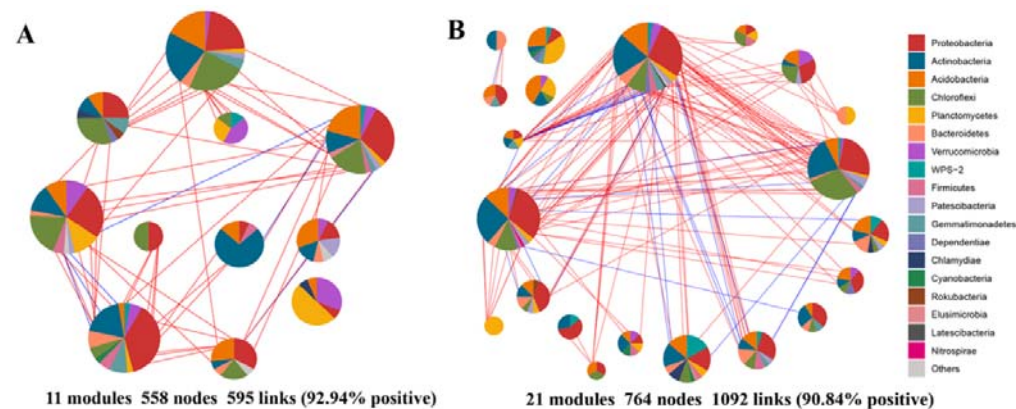

797

798 **Figure 5** Overview of the co-occurrence networks for bacterial communities in surface and  
799 subsurface soils and the bacterial phylum-level composition of the dominant modules. Node

800 size is proportional to the relative abundance. Major phylum (with nodes > 5) were randomly  
 801 colored. Positive links between nodes were colored red and negative links were colored blue.

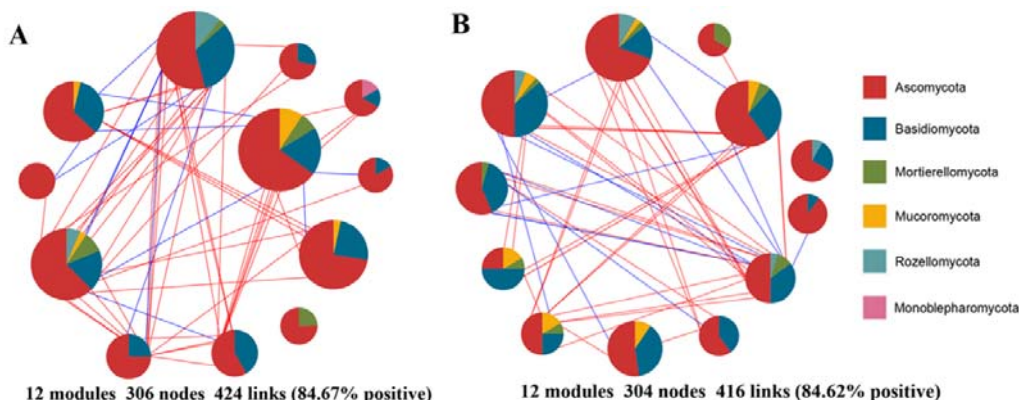

802 **12 modules 306 nodes 424 links (84.67% positive)** **12 modules 304 nodes 416 links (84.62% positive)**

803 **Figure 6 Overview of the co-occurrence networks for fungal communities in surface and**  
 804 **subsurface soils and the fungal phylum-level composition of the dominant modules.** Node  
 805 size is proportional to the relative abundance. Major phylum (with nodes > 5) were randomly  
 806 colored. Positive links between nodes were colored red and negative links were colored blue.

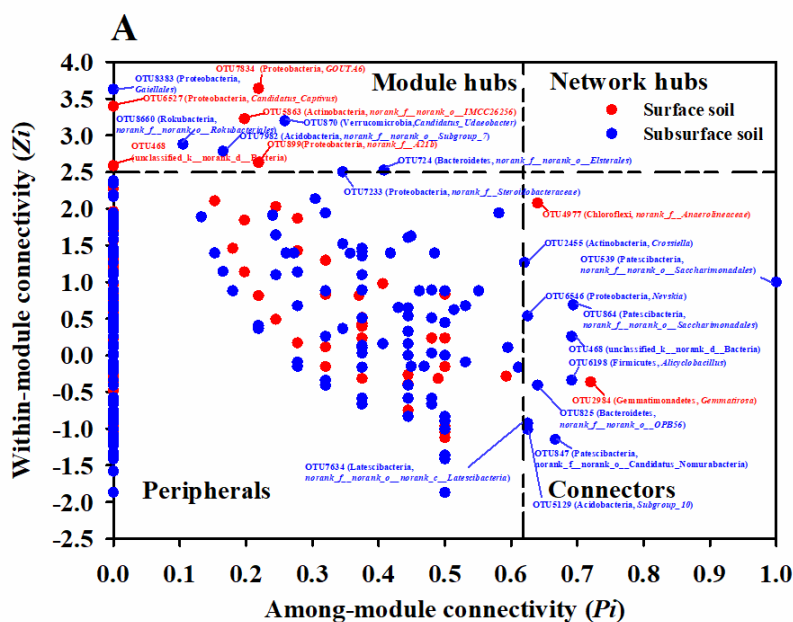

807

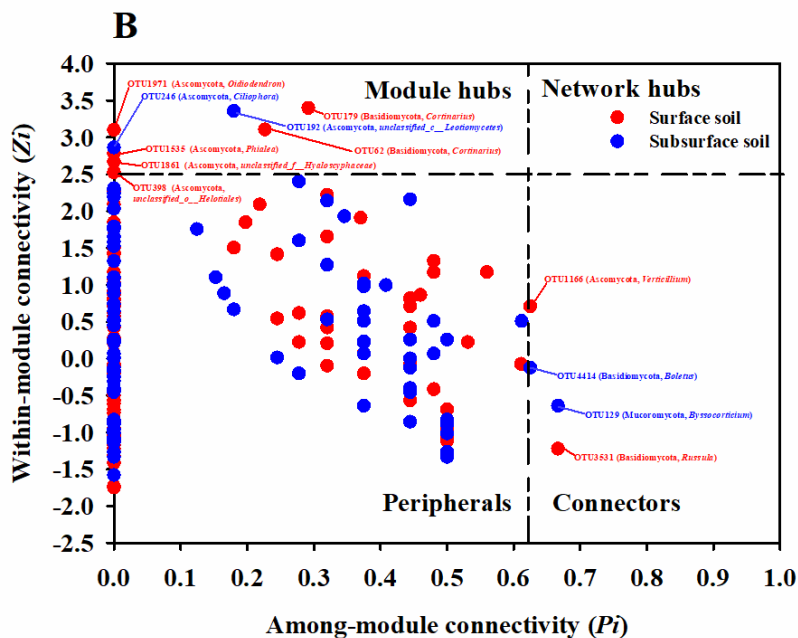

808

809

810 **Figure 7 Topological roles of OTUs in the soil bacterial (A) and fungal (B) co-occurrence**  
811 **networks as indicated by the Zi-Pi plot.**

812 The nodes with  $Z_i > 2.5$  are identified as module hubs, and those with  $P_i > 0.62$  are connectors.

813 The network hubs are determined by  $Z_i > 2.5$  and  $P_i > 0.62$ , and the peripherals are characterized

814 by  $Z_i < 2.5$  and  $P_i < 0.62$

815
